# Supplementary material for: Efficacy of Secukinumab Across Subgroups and Overall Safety in Pediatric Patients with Moderate to Severe Plaque Psoriasis: Week 52 Results from a Phase III Randomized Study
Source: PubMed Central journal article supplement — Paediatr Drugs. 2022 Jun 13;24(4):377–87. doi: 10.1007/s40272-022-00507-0 (PMC9205811; doi:10.1007/s40272-022-00507-0), 2022-06-13
Supplement: 40272_2022_507_MOESM1_ESM.pdf [file 40272_2022_507_MOESM1_ESM.pdf]

**Electronic supplementary material [ESM]**

**Title: Efficacy of Secukinumab Across Subgroups and Overall Safety in Pediatric Patients with Moderate to Severe Plaque Psoriasis: Week 52 Results from a Phase III Randomized Study**

**Journal Name:** Pediatric Drugs

**Authors:** Nina Magnolo, MD<sup>1</sup>, Külli Kingo, MD, PhD<sup>2</sup>, Vivian Laquer, MD<sup>3</sup>, John Browning, MD<sup>4</sup>, Adam Reich MD, PhD<sup>5</sup>, Jacek C. Szepietowski, MD, PhD, FRCP (Edin)<sup>6</sup>, Deborah Keefe, MD, MPH<sup>7</sup>, Philemon Papanastasiou<sup>8</sup>, Weibin Bao, MS<sup>7</sup>, Pascal Forrer, PhD<sup>8</sup>, Manmath Patekar, MD<sup>8</sup>

**Author Affiliations:** <sup>1</sup>University Hospital Münster, Münster, Germany; <sup>2</sup>Tartu University Hospital and University of Tartu, Tartu, Estonia; <sup>3</sup>First OC Dermatology, Fountain Valley, California, USA; <sup>4</sup>University of Texas Health Science Center San Antonio, San Antonio, Texas, USA; <sup>5</sup>Department of Dermatology, Institute of Medical Science, Medical College of Rzeszów University, Rzeszów, Poland; <sup>6</sup> Department of Dermatology, Venereology and Allergology, Wrocław Medical University, Wrocław, Poland; <sup>7</sup>Novartis Pharmaceuticals Corporation, East Hanover, New Jersey, USA; <sup>8</sup>Novartis Pharma AG, Basel, Switzerland

**Corresponding author:**

Nina Magnolo, MD,

University Hospital Münster,

Münster, 48149, Germany.

Email: [Nina.Magnolo@ukmuenster.de](mailto:Nina.Magnolo@ukmuenster.de)

Supplemental Figure 1. Study Design up to Week 52

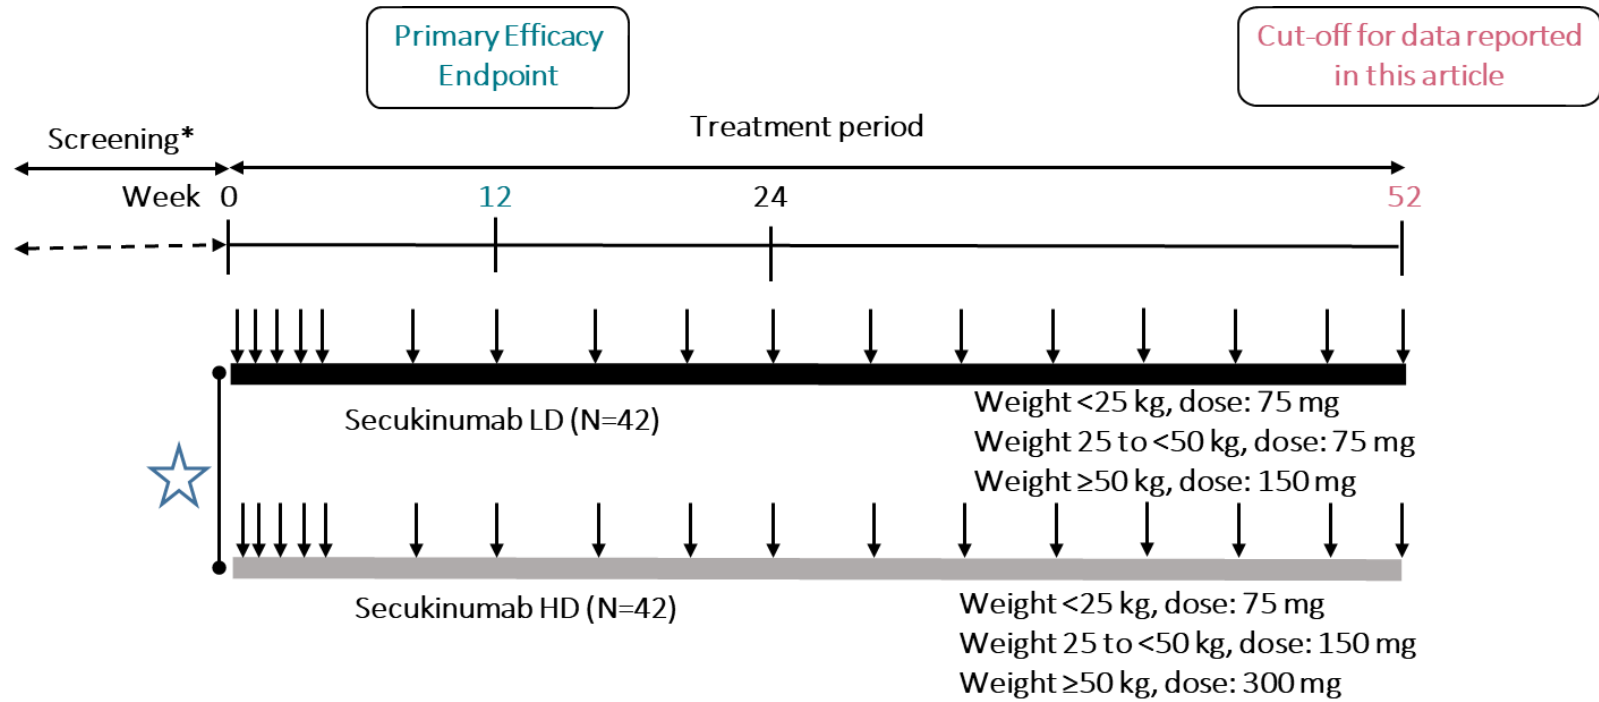

\*Maximum 4 weeks.  Randomization ↓ Active dose administration, including every 4 weeks from week 52 to week 204.  
LD, low dose; HD, high dose; N, number of patients

**Supplemental Table 1. Baseline Characteristics of Participants**

| <b>Characteristics<br/>(All patients randomized)</b>                                                                                                                                                                                                                                                                                                                                                                                                     | <b>Low dose<br/>secukinumab<br/>(N=42)</b> | <b>High dose<br/>secukinumab<br/>(N=42)</b> | <b>Secukinumab<br/>total (N=84)</b> |
|----------------------------------------------------------------------------------------------------------------------------------------------------------------------------------------------------------------------------------------------------------------------------------------------------------------------------------------------------------------------------------------------------------------------------------------------------------|--------------------------------------------|---------------------------------------------|-------------------------------------|
| <b>Age group, n (%)</b>                                                                                                                                                                                                                                                                                                                                                                                                                                  |                                            |                                             |                                     |
| 6 to <12 years                                                                                                                                                                                                                                                                                                                                                                                                                                           | 17 (40.5)                                  | 16 (38.1)                                   | 33 (39.3)                           |
| 12 to <18 years                                                                                                                                                                                                                                                                                                                                                                                                                                          | 25 (59.5)                                  | 26 (61.9)                                   | 51 (60.7)                           |
| <b>Female, n (%)</b>                                                                                                                                                                                                                                                                                                                                                                                                                                     | 20 (47.6)                                  | 25 (59.5)                                   | 45 (53.6)                           |
| <b>Caucasian, n (%)</b>                                                                                                                                                                                                                                                                                                                                                                                                                                  | 39 (92.9)                                  | 38 (90.5)                                   | 77 (91.7)                           |
| <b>Weight strata, n (%)</b>                                                                                                                                                                                                                                                                                                                                                                                                                              |                                            |                                             |                                     |
| <25 kg                                                                                                                                                                                                                                                                                                                                                                                                                                                   | 4 (9.5)                                    | 4 (9.5)                                     | 8 (9.5)                             |
| 25 to <50 kg                                                                                                                                                                                                                                                                                                                                                                                                                                             | 13 (31.0)                                  | 12 (28.6)                                   | 25 (29.8)                           |
| ≥50 kg                                                                                                                                                                                                                                                                                                                                                                                                                                                   | 25 (59.5)                                  | 26 (61.9)                                   | 51 (60.7)                           |
| <b>BMI (kg/m<sup>2</sup>), mean (SD)</b>                                                                                                                                                                                                                                                                                                                                                                                                                 | 21.7 (5.2)                                 | 22.2 (4.5)                                  | 21.9 (4.8)                          |
| <b>Disease severity strata<sup>a</sup> (as per randomization), n (%)</b>                                                                                                                                                                                                                                                                                                                                                                                 |                                            |                                             |                                     |
| Moderate                                                                                                                                                                                                                                                                                                                                                                                                                                                 | 30 (71.4)                                  | 31 (73.8)                                   | 61 (72.6)                           |
| Severe                                                                                                                                                                                                                                                                                                                                                                                                                                                   | 12 (28.6)                                  | 11 (26.2)                                   | 23 (27.4)                           |
| <b>Baseline IGA score, n (%)</b>                                                                                                                                                                                                                                                                                                                                                                                                                         |                                            |                                             |                                     |
| 3=Moderate disease                                                                                                                                                                                                                                                                                                                                                                                                                                       | 29 (69.0)                                  | 29 (69.0)                                   | 58 (69.0)                           |
| 4=Severe disease                                                                                                                                                                                                                                                                                                                                                                                                                                         | 13 (31.0)                                  | 13 (31.0)                                   | 26 (31.0)                           |
| <b>PASI, mean (SD), at baseline</b>                                                                                                                                                                                                                                                                                                                                                                                                                      | 18.5 (5.2)                                 | 19.3 (6.7)                                  | 18.9 (6.0)                          |
| <b>CDLQI total score, mean (SD), at baseline</b>                                                                                                                                                                                                                                                                                                                                                                                                         | 10.6 (6.0)                                 | 13.0 (7.0)                                  | –                                   |
| <sup>a</sup> Disease severity strata: moderate=PASI score 12 to <20 and IGA mod 2011 score 3/4 or PASI score ≥20 and IGA mod 2011 score 3 and severe=PASI score ≥20 and IGA mod 2011 score 4<br>BMI, body mass index; CDLQI, Children’s Dermatology Life Quality Index; IGA mod2011, Investigator’s Global Assessment modified 2011; N, total number of patients; n, number of patients; PASI, Psoriasis Area and Severity Index; SD, standard deviation |                                            |                                             |                                     |

Supplemental Figure 2. IGA mod 2011 and PASI Responses (Weeks 0–52) (Analyses by Age and Dose Groups)

S2.A Low Dose Secukinumab (6–<12 years); (N=17)

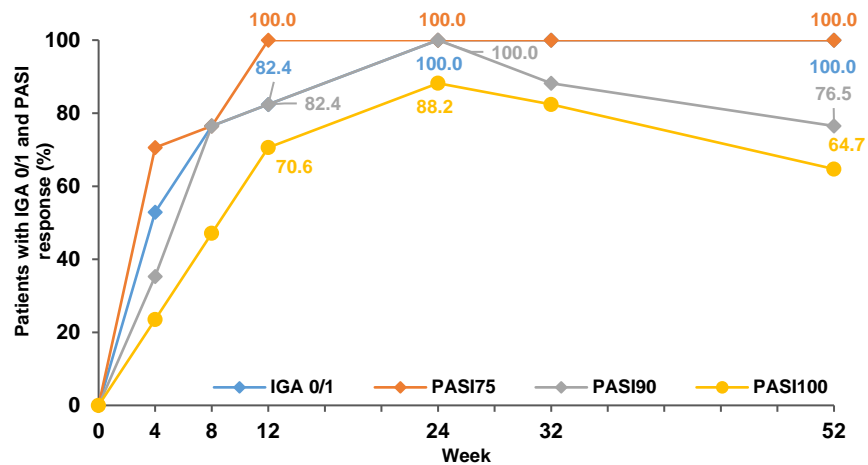

S2.B High Dose Secukinumab (6–<12 years); (N=16)

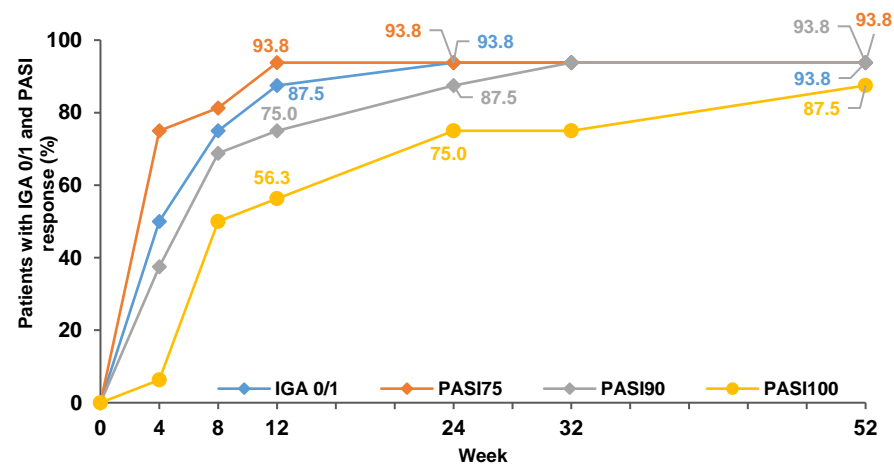

S2.C Low Dose Secukinumab (12–<18 years); (N=25)

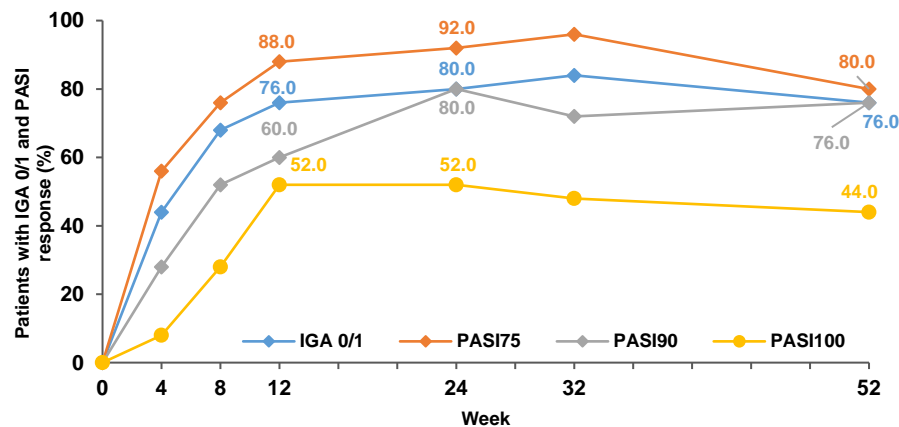

S2.D High Dose Secukinumab (12–<18 years); (N=26)

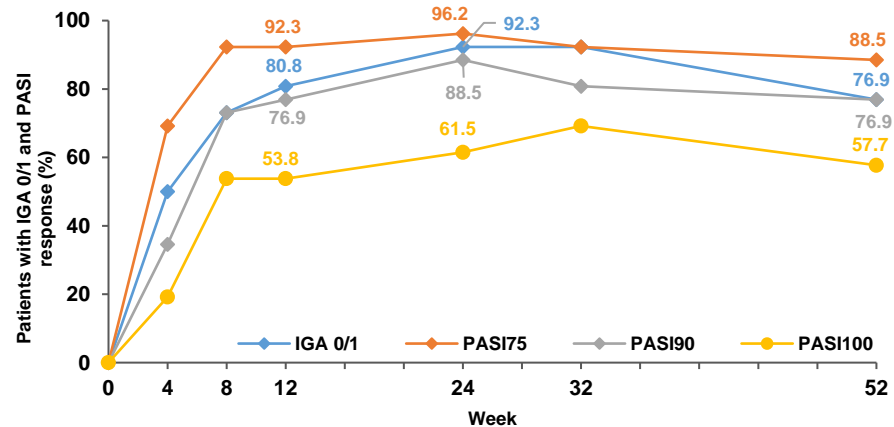

IGA 0/1, Investigator's Global Assessment 0/1; N, total number of patients; PASI, Psoriasis Area and Severity Index

**Supplemental Figure 3. IGA 0/1 and PASI Responses (Weeks 0–52) (Analyses by Baseline Body Weight and Dose Groups)<sup>a</sup>**

**S3.A Secukinumab 75 mg (<25 kg); (N=8)**

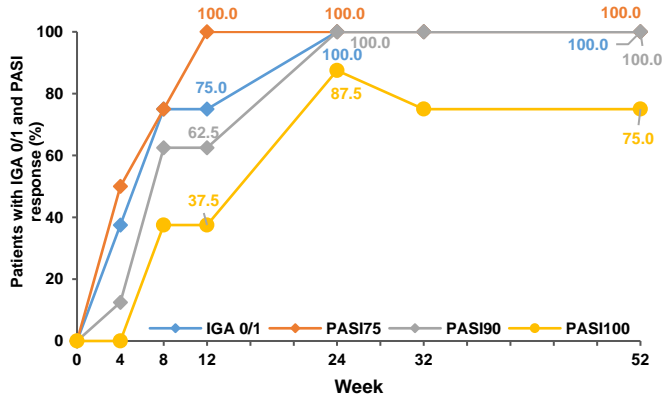

**S3.B Secukinumab 75 mg (25–<50 kg); (N=13)**

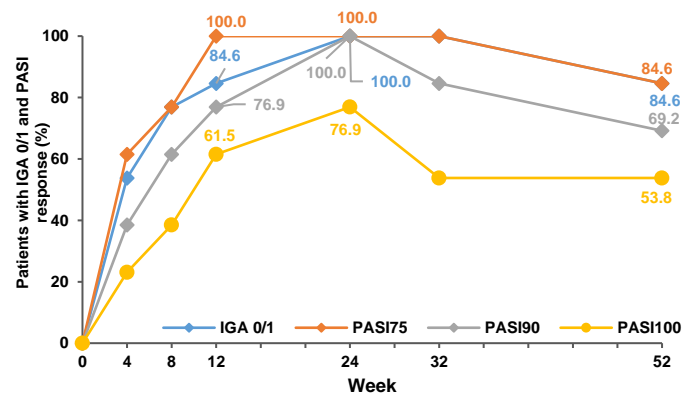

**S3.C Secukinumab 150 mg (25–<50 kg); (N=12)**

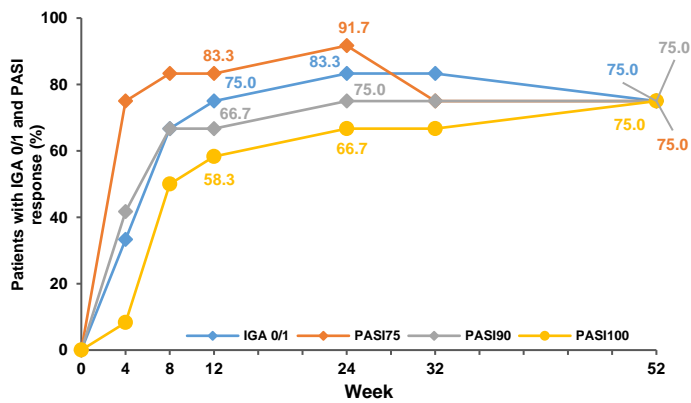

**S3.D Secukinumab 150 mg (≥50 kg); (N=25)**

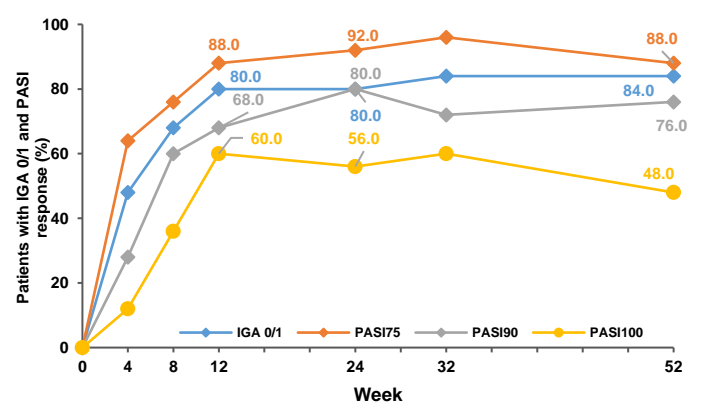

**S3.E Secukinumab 300 mg (≥50 kg); (N=26)**

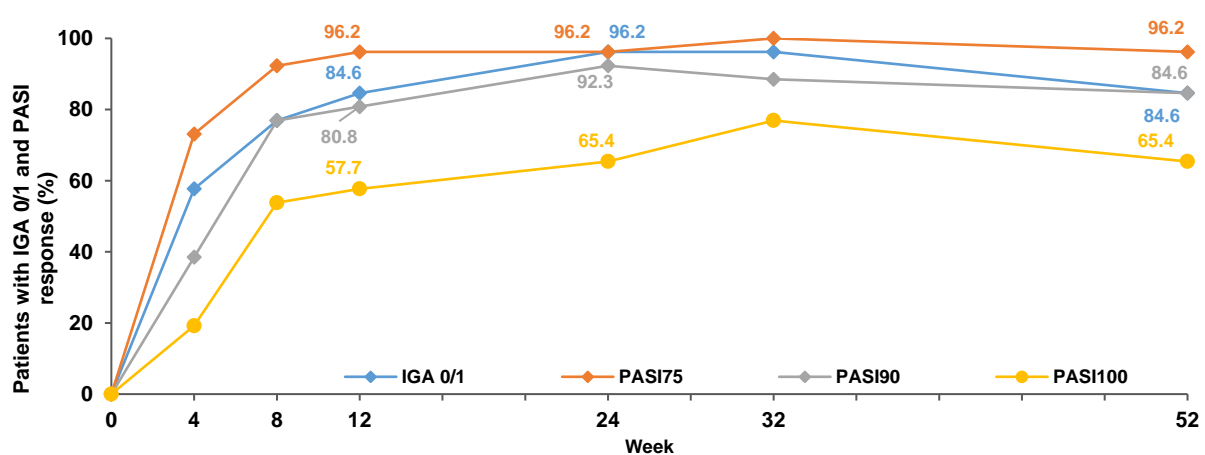

<sup>a</sup>Body weight and dose group (secukinumab 75 mg [LD] and <25 kg, secukinumab 75 mg [LD] and 25 to <50 kg, secukinumab 150 mg [HD] and 25 to <50 kg, secukinumab 150 mg [HD] and ≥50 kg; secukinumab 300 mg and ≥50kg)

Note: There were no patients in ≥50 kg group for secukinumab 75 mg, <25 kg group for secukinumab 150 mg and 25 kg and ≥25 to <50 kg group for secukinumab 300 mg

IGA 0/1, Investigator’s Global Assessment 0/1; N, total number of patients; PASI, PsoriasisArea and Severity Index

**Supplemental Figure 4. IGA 0/1 and PASI Responses (Weeks 0–52) (Analyses by Baseline Disease Severity and Dose Groups)**

**S4.A Low Dose Secukinumab (Moderate); (N=30)**

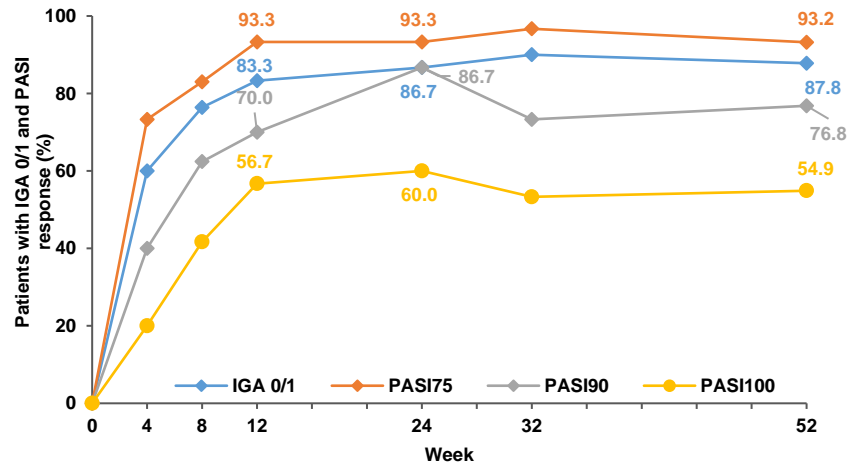

**S4.B High Dose Secukinumab (Moderate); (N=31)**

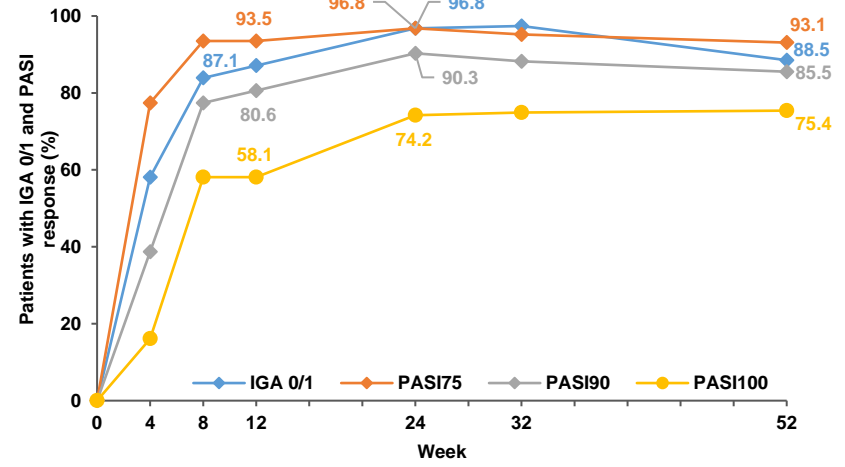

**S4.C Low Dose Secukinumab (Severe); (N=12)**

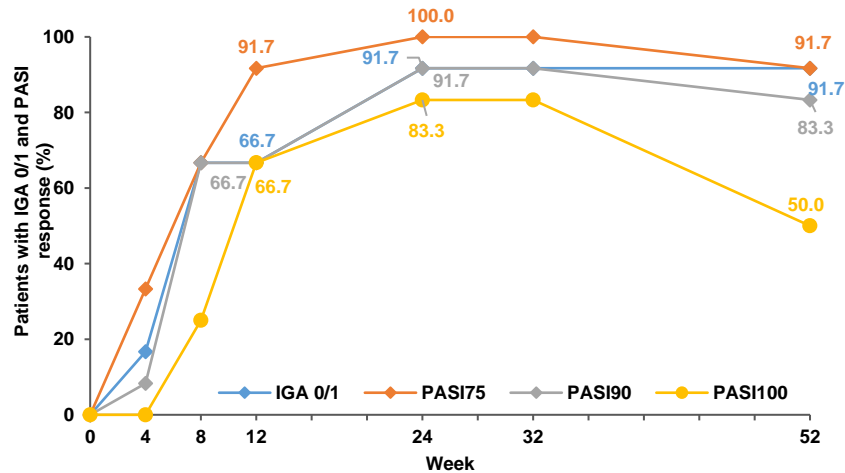

**S4.D High Dose Secukinumab (Severe); (N=11)**

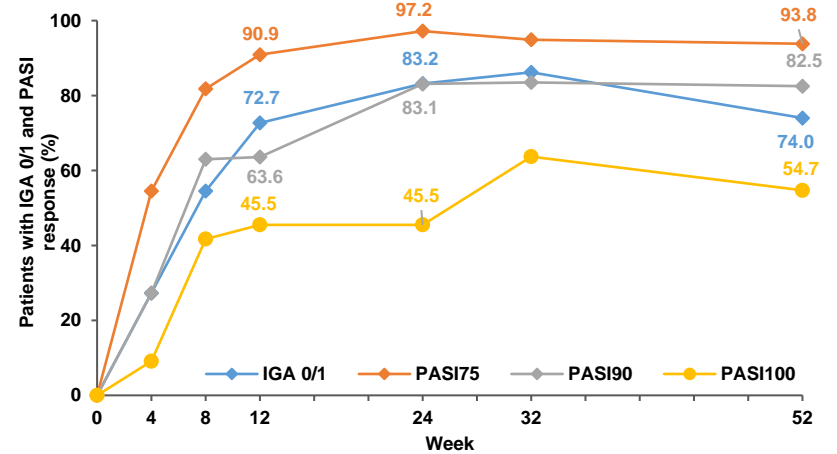

IGA 0/1, Investigator’s Global Assessment 0/1; N, total number of patients; PASI, Psoriasis Area and Severity Index
